# Supplementary material for: The calcineurin inhibitor, Sarah/Nebula, exacerbates Aβ42 phenotypes in aDrosophilamodel of Alzheimer's disease
Source: Oxford University Press journal article supplement (doi:10.1242/dmm.018069), 2015-01-01
Supplement: dmm018069supp.pdf [file dmm018069supp.pdf]

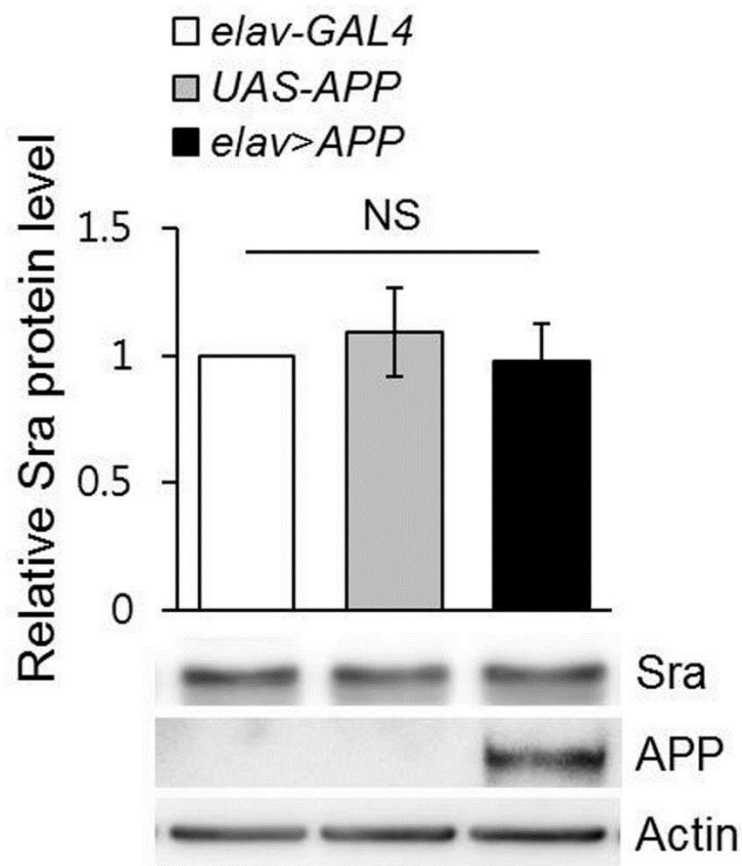

Fig. S1. Western blot analysis of Sra in *APP*-expressing flies. Western blot analysis with an anti-Sra antibody shows that Sra protein is not altered in pan-neuronally *APP*-expressing (*elav>APP*) fly heads compared with that of the control (*elav-GAL4* and *UAS-APP*). Actin was used as an internal loading control. All data are expressed as mean  $\pm$  s.e. (Tukey-Kramer test,  $n = 4$ , NS, not significant).

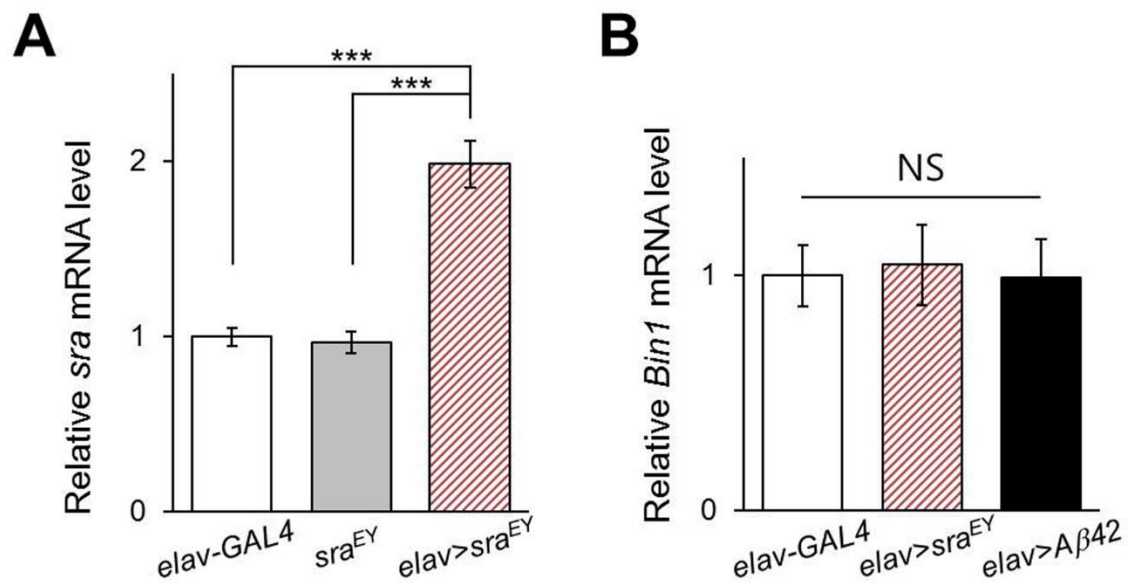

Fig. S2. Analyses of *sra* and *Bin1* gene expression in adult fly heads using real-time quantitative PCR. (A) Real-time quantitative PCR results show relative fold change in *sra* (A) and *Bin1* (B) transcript levels for the indicated fly lines. All data are expressed as mean  $\pm$  s.e. (A, Tukey-Kramer test,  $n \geq 4$ , \*\*\* $p < 0.001$ ; B, Tukey-Kramer test,  $n \geq 10$ ; NS, not significant).

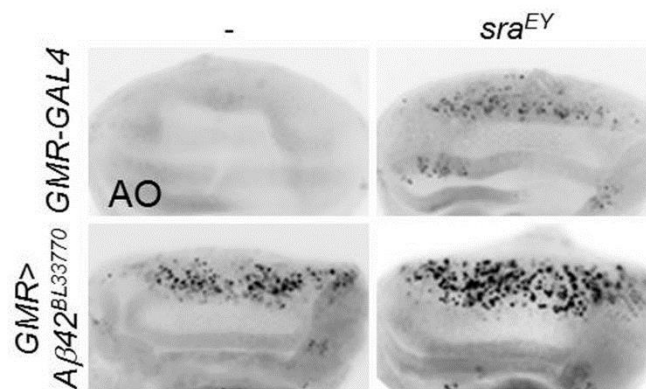

Fig. S3. Overexpression of *sra* aggravates *Aβ42*-induced cell death in the *Drosophila* larval eye disc. Representative images of AO-stained *sra*- and *Aβ42*-expressing larval eye imaginal discs (n = 10). AO, acridine orange.

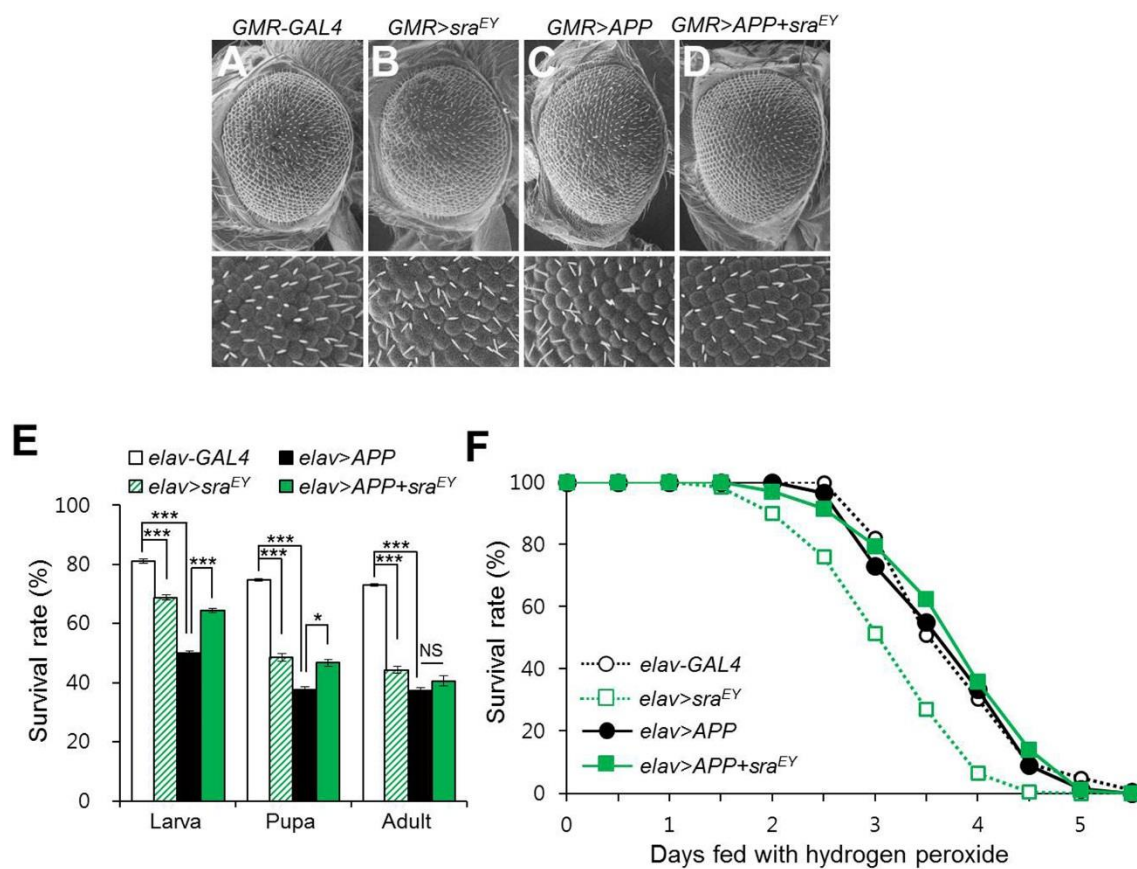

Fig. S4. Overexpression of *sra* partially rescues *APP*-expressing fly phenotypes. (A-D) Eye phenotypes induced by ectopic expression of *APP* in the developing eye were partially rescued by *sra* overexpression. The *APP*-expressing adults exhibit a mild rough eye phenotype (C) relative to that of the control eye (A). Overexpression of *sra* alone resulted in a marginally rough eye phenotype (B) when compared to that of the control (A). Overexpression of *sra* in *APP*-expressing flies rescued the rough eye phenotype (D) relative to that of *APP*-expressing flies (C). The lower pictures are the magnified images of the each genotype in the upper pictures. (E) Survival rates of pan-neuronal *APP*-expressing flies with *sra* overexpression (*elav>APP+sra<sup>EY</sup>*). The effects of overexpressed *sra* (*elav>sra<sup>EY</sup>*) in the

control (*elav-GAL4*) are also shown (Tukey-Kramer test,  $n \geq 400$ ,  $*p < 0.05$ ,  $***p < 0.001$ , NS, not significant). (F) Survival rates of *APP*-expressing flies overexpressing *sra* under oxidative stress conditions ( $n = 200$ ). The Kaplan-Meier estimator and log-rank test was used to determine significant differences in survival rates of samples. *elav-GAL4* vs *elav>sra<sup>EY</sup>*:  $p < 0.0001$ ; *elav-GAL4* vs *elav>APP*:  $p = 0.5813$ ; *elav>sra<sup>EY</sup>* vs *elav>APP+sra<sup>EY</sup>*:  $p < 0.0001$ ; *elav>APP* vs *elav>APP+sra<sup>EY</sup>*:  $p = 0.2268$ .

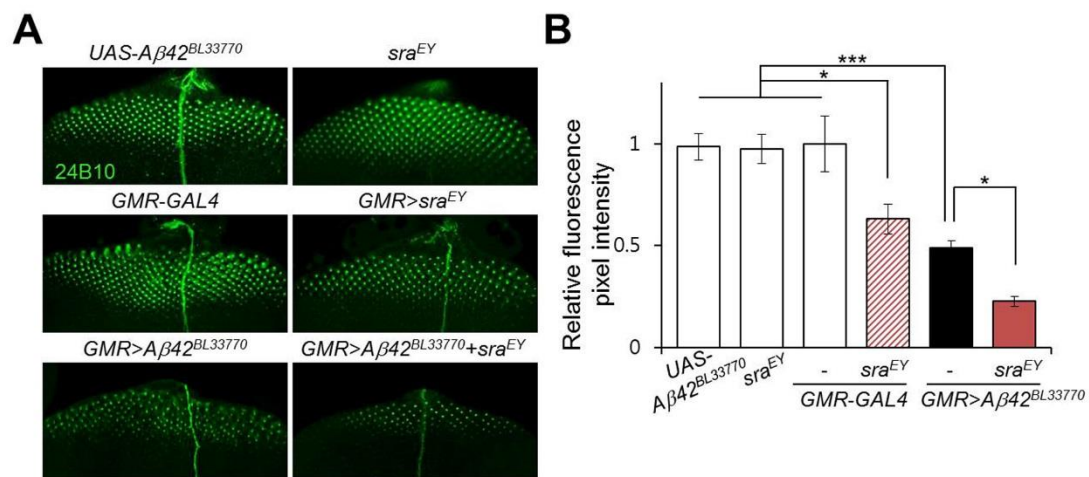

Fig. S5. Overexpression of *sra* aggravates *Aβ42*-induced phenotypes in *Aβ42*-expressing flies.

(A) Representative immunohistochemistry images of photoreceptor neurons in larval eye discs. Each indicated fly was stained with an anti-Chaoptin antibody (24B10) to show photoreceptor neurons. Magnification of the pictures,  $\times 200$ . (B) The graph shows the relative fluorescence pixel intensity in photoreceptor neurons (Tukey-Kramer test,  $n \geq 10$ ,  $*p < 0.05$ ,  $***p < 0.001$ , NS, not significant).

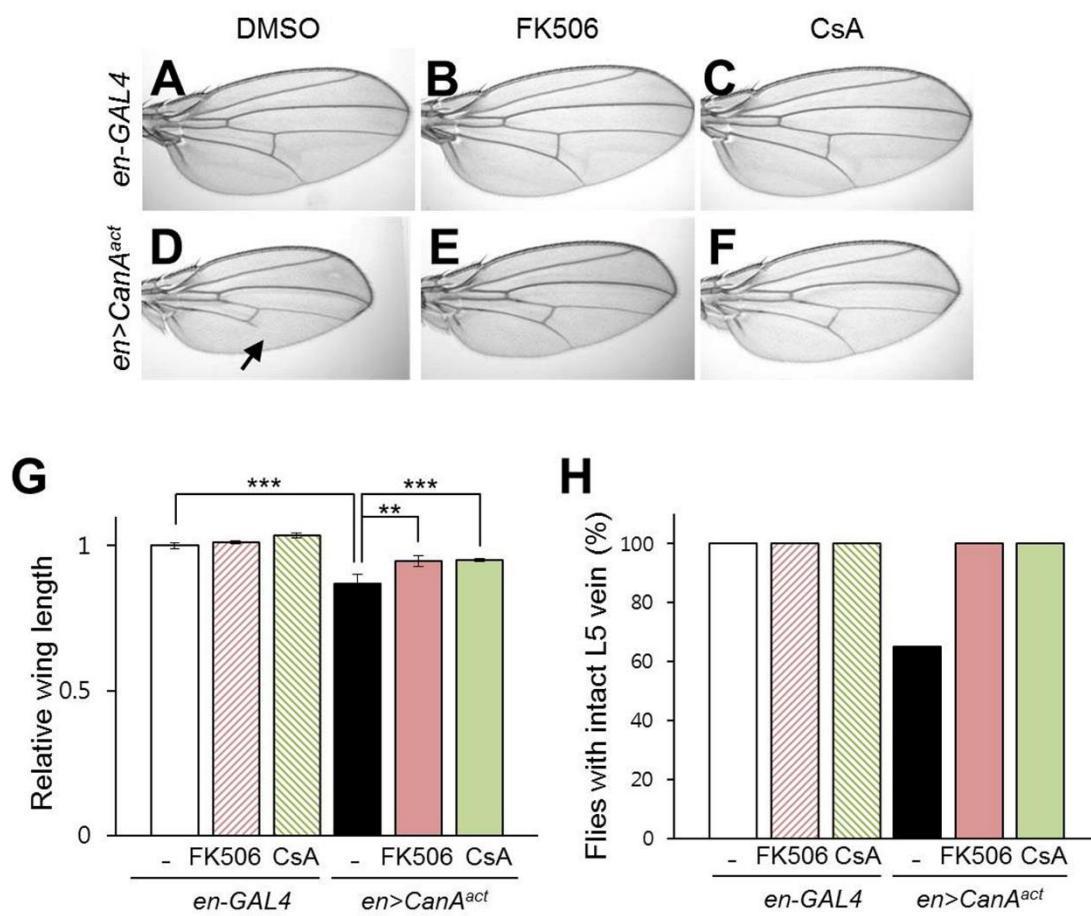

Fig. S6. Chemical calcineurin inhibitors inhibit calcineurin signaling. FK506 and CsA, chemical calcineurin inhibitors, suppress the phenotypes induced by a constitutively active form of calcineurin (*CanA<sup>act</sup>*). (A-F) Representative images of developing wing phenotypes in DMSO-fed (A, D), 50  $\mu$ M FK506-fed (B, E), and 20  $\mu$ M CsA-fed (C, F) flies with (D-F; *en>CanA<sup>act</sup>*) or without (A-C; *en-GAL4*) *CanA<sup>act</sup>* expression. The reduced wing size and loss of wing veins (arrow) resulting from *CanA<sup>act</sup>* expression were suppressed by the inhibitors. (G, H) The graph shows the relative size (G, all data are expressed as mean  $\pm$  s.e., Tukey-Kramer test,  $n = 20$ , \*\* $p < 0.01$ , \*\*\* $p < 0.001$ ) and intact L5 vein (H,  $n = 20$ ) in the developing wing in each experimental group. CsA, cyclosporin A.

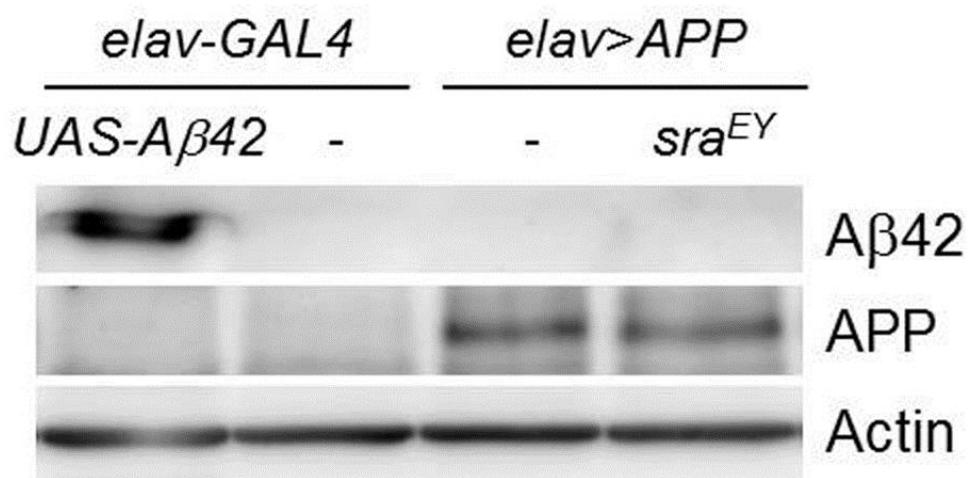

Fig. S7. Western blot analysis of Aβ42 levels in the head region of *Aβ42*- or *APP*-expressing flies. Aβ42 protein is not produced in *APP*-expressing (*elav>APP*) fly heads. The head extract of *Aβ42*-expressing flies (*elav>Aβ42*) was used as a positive control. Actin was used as an internal loading control.



Table S1. The genotypes of samples in figures.

| No. figure    | Symbol                                                    | Genotype                                                                                                   |
|---------------|-----------------------------------------------------------|------------------------------------------------------------------------------------------------------------|
| <b>Fig. 1</b> |                                                           |                                                                                                            |
| A-D           | <i>sra</i> > <i>EGFP</i>                                  | <i>UAS-2×EGFP/+; sra-GAL4/+</i>                                                                            |
|               | <i>sra</i> <sup>KO</sup>                                  | <i>sra</i> <sup>KO</sup> / <i>sra</i> <sup>KO</sup>                                                        |
| E, F          | <i>elav-GAL4</i>                                          | <i>elav-GAL4/elav-GAL4</i>                                                                                 |
|               | <i>UAS-Aβ42</i>                                           | <i>UAS-Aβ42/UAS-Aβ42</i>                                                                                   |
|               | <i>elav&gt;Aβ42</i>                                       | <i>UAS-Aβ42/UAS-Aβ42; elav-GAL4/elav-GAL4</i>                                                              |
| <b>Fig. 2</b> |                                                           |                                                                                                            |
| A-P           | <i>sra</i> <sup>EY</sup>                                  | <i>sra</i> <sup>EY07182/+</sup>                                                                            |
|               | <i>UAS-sra</i>                                            | <i>UAS-sra/+</i>                                                                                           |
|               | <i>GMR&gt;sra</i> <sup>EY</sup>                           | <i>GMR-GAL4/+; sra</i> <sup>EY07182/+</sup>                                                                |
|               | <i>GMR&gt;sra</i>                                         | <i>GMR-GAL4/UAS-sra</i>                                                                                    |
|               | <i>GMR; sra</i> <sup>KO/+</sup>                           | <i>GMR-GAL4/+; sra</i> <sup>KO/+</sup>                                                                     |
|               | <i>GMR&gt;DIAP1</i>                                       | <i>GMR-GAL4/+; UAS-DIAP1/+</i>                                                                             |
|               | <i>GMR-GAL4</i>                                           | <i>GMR-GAL4/+</i>                                                                                          |
|               | <i>GMR&gt;Aβ42</i> <sup>BL33770</sup>                     | <i>GMR-GAL4, UAS-Aβ42</i> <sup>BL33770/+</sup>                                                             |
|               | <i>GMR&gt;Aβ42</i> <sup>BL33770/+sra<sup>EY</sup></sup>   | <i>GMR-GAL4, UAS-Aβ42</i> <sup>BL33770/+</sup> ; <i>sra</i> <sup>EY07182/+</sup>                           |
|               | <i>GMR&gt;Aβ42</i> <sup>BL33770/+sra</sup>                | <i>GMR-GAL4, UAS-Aβ42</i> <sup>BL33770/+</sup> / <i>UAS-sra</i>                                            |
|               | <i>GMR&gt;Aβ42</i> <sup>BL33770/+sra<sup>KO/+</sup></sup> | <i>GMR-GAL4, UAS-Aβ42</i> <sup>BL33770/+</sup> ; <i>sra</i> <sup>KO/+</sup>                                |
|               | <i>GMR&gt;sra</i> <sup>EY</sup> + <i>DIAP1</i>            | <i>GMR-GAL4/+; sra</i> <sup>EY07182/+</sup> / <i>UAS-DIAP1</i>                                             |
| Q, S, T       | <i>elav-GAL4</i>                                          | <i>elav-GAL4/elav-GAL4</i>                                                                                 |
|               | <i>elav&gt;Aβ42</i>                                       | <i>UAS-Aβ42/UAS-Aβ42; elav-GAL4/elav-GAL4</i>                                                              |
|               | <i>elav&gt;sra</i> <sup>EY</sup>                          | <i>elav-GAL4, sra</i> <sup>EY07182/+</sup> / <i>elav-GAL4, sra</i> <sup>EY07182/+</sup>                    |
|               | <i>elav&gt;Aβ42+sra</i> <sup>EY</sup>                     | <i>UAS-Aβ42/UAS-Aβ42; elav-GAL4, sra</i> <sup>EY07182/+</sup> / <i>elav-GAL4, sra</i> <sup>EY07182/+</sup> |
| R             | <i>elav-GAL4</i>                                          | <i>elav-GAL4/+</i>                                                                                         |
|               | <i>sra</i> <sup>EY</sup>                                  | <i>sra</i> <sup>EY07182/+</sup>                                                                            |
|               | <i>UAS-Aβ42</i>                                           | <i>UAS-Aβ42/+</i>                                                                                          |
|               | <i>elav&gt;Aβ42</i>                                       | <i>UAS-Aβ42/+; elav-GAL4/+</i>                                                                             |
|               | <i>elav&gt;sra</i> <sup>EY</sup>                          | <i>elav-GAL4/sra</i> <sup>EY07182/+</sup>                                                                  |

|               | <i>elav&gt;Aβ42+sra<sup>EY</sup></i>                  | <i>UAS-Aβ42/+; elav-GAL4/sra<sup>EY07182</sup></i>                                                                            |
|---------------|-------------------------------------------------------|-------------------------------------------------------------------------------------------------------------------------------|
| <b>Fig. 3</b> |                                                       |                                                                                                                               |
| A-B           | <i>UAS-Aβ42</i>                                       | <i>UAS-Aβ42/UAS-Aβ42</i>                                                                                                      |
|               | <i>sra<sup>EY</sup></i>                               | <i>sra<sup>EY07182</sup>/sra<sup>EY07182</sup></i>                                                                            |
|               | <i>elav-GAL4</i>                                      | <i>elav-GAL4/elav-GAL4</i>                                                                                                    |
|               | <i>elav&gt;sra<sup>EY</sup></i>                       | <i>elav-GAL4, sra<sup>EY07182</sup>/elav-GAL4, sra<sup>EY07182</sup></i>                                                      |
|               | <i>elav&gt;Aβ42</i>                                   | <i>UAS-Aβ42/UAS-Aβ42; elav-GAL4/elav-GAL4</i>                                                                                 |
|               | <i>elav&gt;Aβ42+sra<sup>EY</sup></i>                  | <i>UAS-Aβ42/UAS-Aβ42; elav-GAL4, sra<sup>EY07182</sup>/elav-GAL4, sra<sup>EY07182</sup></i>                                   |
| C             | <i>GMR-GAL4</i>                                       | <i>GMR-GAL4/GMR-GAL4</i>                                                                                                      |
|               | <i>GMR&gt;sra<sup>EY</sup></i>                        | <i>GMR-GAL4/GMR-GAL4; sra<sup>EY07182</sup>/sra<sup>EY07182</sup></i>                                                         |
|               | <i>GMR&gt;Aβ42<sup>BL33770</sup></i>                  | <i>GMR-GAL4, UAS-Aβ42<sup>BL33770</sup>/GMR-GAL4, UAS-Aβ42<sup>BL33770</sup></i>                                              |
|               | <i>GMR&gt;Aβ42<sup>BL33770</sup>+sra<sup>EY</sup></i> | <i>GMR-GAL4, UAS-Aβ42<sup>BL33770</sup>/GMR-GAL4, UAS-Aβ42<sup>BL33770</sup>; sra<sup>EY07182</sup>/sra<sup>EY07182</sup></i> |

|               | <i>sra<sup>EY</sup></i>              | <i>sra<sup>EY07182</sup>/+</i>                     |
|---------------|--------------------------------------|----------------------------------------------------|
| <b>Fig. 4</b> |                                      |                                                    |
|               | <i>UAS-Aβ42</i>                      | <i>UAS-Aβ42/+</i>                                  |
|               | <i>sra<sup>EY</sup></i>              | <i>sra<sup>EY07182</sup>/+</i>                     |
|               | <i>elav-GAL4</i>                     | <i>elav-GAL4/+</i>                                 |
|               | <i>sra<sup>EY</sup></i>              | <i>sra<sup>EY07182</sup>/+</i>                     |
|               | <i>elav&gt;Aβ42+sra<sup>EY</sup></i> | <i>UAS-Aβ42/+; elav-GAL4/sra<sup>EY07182</sup></i> |

|               | <i>elav-GAL4</i>                     | <i>elav-GAL4/+</i>                                 |
|---------------|--------------------------------------|----------------------------------------------------|
| <b>Fig. 5</b> |                                      |                                                    |
|               | <i>elav&gt;sra<sup>EY</sup></i>      | <i>elav-GAL4/sra<sup>EY07182</sup></i>             |
|               | <i>elav&gt;Aβ42</i>                  | <i>UAS-Aβ42/+; elav-GAL4/+</i>                     |
|               | <i>elav&gt;Aβ42+sra<sup>EY</sup></i> | <i>UAS-Aβ42/+; elav-GAL4/sra<sup>EY07182</sup></i> |

|               | <i>GMR-GAL4</i>                            | <i>GMR-GAL4/+</i>                                               |
|---------------|--------------------------------------------|-----------------------------------------------------------------|
| <b>Fig. 6</b> |                                            |                                                                 |
| A-K           | <i>GMR&gt;CanAi</i>                        | <i>GMR-GAL4/+; UAS-CanA1 RNAi/+</i>                             |
|               | <i>GMR&gt;CanBi</i>                        | <i>GMR-GAL4/+; UAS-CanB RNAi/+</i>                              |
|               | <i>GMR&gt;Aβ42<sup>BL33770</sup></i>       | <i>GMR-GAL4, UAS-Aβ42<sup>BL33770</sup>/+</i>                   |
|               | <i>GMR&gt;Aβ42<sup>BL33770</sup>+CanAi</i> | <i>GMR-GAL4, UAS-Aβ42<sup>BL33770</sup>/+; UAS-CanA1 RNAi/+</i> |
|               | <i>GMR&gt;Aβ42<sup>BL33770</sup>+CanBi</i> | <i>GMR-GAL4, UAS-Aβ42<sup>BL33770</sup>/+; UAS-CanB RNAi/+</i>  |
|               | <i>CanAi</i>                               | <i>UAS-CanA1 RNAi/+</i>                                         |

|      |                            |                                              |
|------|----------------------------|----------------------------------------------|
| L, M | <i>elav-GAL4</i>           | <i>elav-GAL4/+</i>                           |
|      | <i>elav&gt;CanAi1</i>      | <i>elav-GAL4/UAS-CanAi1 RNAi</i>             |
|      | <i>elav&gt;Aβ42</i>        | <i>UAS-Aβ42/+; elav-GAL4/+</i>               |
|      | <i>elav&gt;Aβ42+CanAi1</i> | <i>UAS-Aβ42/+; elav-GAL4/UAS-CanAi1 RNAi</i> |

Fig. S1

|  |                    |                                     |
|--|--------------------|-------------------------------------|
|  | <i>elav-GAL4</i>   | <i>elav-GAL4/+</i>                  |
|  | <i>UAS-APP</i>     | <i>UAS-APP-N-myc/+</i>              |
|  | <i>elav&gt;APP</i> | <i>UAS-APP-N-myc/+; elav-GAL4/+</i> |

Fig. S2

|  |                                 |                                        |
|--|---------------------------------|----------------------------------------|
|  | <i>elav-GAL4</i>                | <i>elav-GAL4/+</i>                     |
|  | <i>sra<sup>EY</sup></i>         | <i>sra<sup>EY07182</sup>/+</i>         |
|  | <i>elav&gt;sra<sup>EY</sup></i> | <i>elav-GAL4/sra<sup>EY07182</sup></i> |
|  | <i>elav&gt;Aβ42</i>             | <i>UAS-Aβ42/+; elav-GAL4/+</i>         |

Fig. S3

|  |                                                       |                                                                                                                               |
|--|-------------------------------------------------------|-------------------------------------------------------------------------------------------------------------------------------|
|  | <i>GMR-GAL4</i>                                       | <i>GMR-GAL4/GMR-GAL4</i>                                                                                                      |
|  | <i>GMR&gt;sra<sup>EY</sup></i>                        | <i>GMR-GAL4/GMR-GAL4; sra<sup>EY07182</sup>/sra<sup>EY07182</sup></i>                                                         |
|  | <i>GMR&gt;Aβ42<sup>BL33770</sup></i>                  | <i>GMR-GAL4, UAS-Aβ42<sup>BL33770</sup>/GMR-GAL4, UAS-Aβ42<sup>BL33770</sup></i>                                              |
|  | <i>GMR&gt;Aβ42<sup>BL33770</sup>+sra<sup>EY</sup></i> | <i>GMR-GAL4, UAS-Aβ42<sup>BL33770</sup>/GMR-GAL4, UAS-Aβ42<sup>BL33770</sup>; sra<sup>EY07182</sup>/sra<sup>EY07182</sup></i> |

Fig. S4

|      |                                     |                                                          |
|------|-------------------------------------|----------------------------------------------------------|
| A-D  | <i>GMR-GAL4</i>                     | <i>GMR-GAL4/+</i>                                        |
|      | <i>GMR&gt;sra<sup>EY</sup></i>      | <i>GMR-GAL4/+; sra<sup>EY07182</sup>/+</i>               |
|      | <i>GMR&gt;APP</i>                   | <i>GMR-GAL4/UAS-APP-N-myc</i>                            |
|      | <i>GMR&gt;APP+sra<sup>EY</sup></i>  | <i>GMR-GAL4/UAS-APP-N-myc; sra<sup>EY07182</sup>/+</i>   |
| E, F | <i>elav-GAL4</i>                    | <i>elav-GAL4/+</i>                                       |
|      | <i>elav&gt;sra<sup>EY</sup></i>     | <i>elav-GAL4/sra<sup>EY07182</sup></i>                   |
|      | <i>elav&gt;APP</i>                  | <i>UAS-APP-N-myc/+; elav-GAL4/+</i>                      |
|      | <i>elav&gt;APP+sra<sup>EY</sup></i> | <i>UAS-APP-N-myc/+; elav-GAL4/ sra<sup>EY07182</sup></i> |

Fig. S5

|  |                                   |                                                                       |
|--|-----------------------------------|-----------------------------------------------------------------------|
|  | <i>UAS-Aβ42<sup>BL33770</sup></i> | <i>UAS-Aβ42<sup>BL33770</sup>/UAS-Aβ42<sup>BL33770</sup></i>          |
|  | <i>sra<sup>EY</sup></i>           | <i>sra<sup>EY07182</sup>/sra<sup>EY07182</sup></i>                    |
|  | <i>GMR-GAL4</i>                   | <i>GMR-GAL4/GMR-GAL4</i>                                              |
|  | <i>GMR&gt;sra<sup>EY</sup></i>    | <i>GMR-GAL4/GMR-GAL4; sra<sup>EY07182</sup>/sra<sup>EY07182</sup></i> |

|                                                       |                                                                                                                               |
|-------------------------------------------------------|-------------------------------------------------------------------------------------------------------------------------------|
| <i>GMR&gt;Aβ42<sup>BL33770</sup></i>                  | <i>GMR-GAL4, UAS-Aβ42<sup>BL33770</sup>/GMR-GAL4, UAS-Aβ42<sup>BL33770</sup></i>                                              |
| <i>GMR&gt;Aβ42<sup>BL33770</sup>+sra<sup>EY</sup></i> | <i>GMR-GAL4, UAS-Aβ42<sup>BL33770</sup>/GMR-GAL4, UAS-Aβ42<sup>BL33770</sup>; sra<sup>EY07182</sup>/sra<sup>EY07182</sup></i> |

---

Fig. S6

|                                 |                                          |
|---------------------------------|------------------------------------------|
| <i>en-GAL4</i>                  | <i>en2.4-GAL4/+</i>                      |
| <i>en&gt;CanA<sup>act</sup></i> | <i>en2.4-GAL4/UAS-CanA<sup>act</sup></i> |

---

Fig. S7

|                                     |                                                         |
|-------------------------------------|---------------------------------------------------------|
| <i>elav&gt;Aβ42</i>                 | <i>UAS-Aβ42/+; elav-GAL4/+</i>                          |
| <i>elav-GAL4</i>                    | <i>elav-GAL4/+</i>                                      |
| <i>elav&gt;APP</i>                  | <i>UAS-APP-N-myc/+; elav-GAL4/+</i>                     |
| <i>elav&gt;APP+sra<sup>EY</sup></i> | <i>UAS-APP-N-myc/+; elav-GAL4/sra<sup>EY07182</sup></i> |
